# Supplementary material
Source: publisher figshare collection journal article supplement (https://acs.figshare.com/ndownloader/files/7691104)
Supplement: Supplementary file 1 [file 7691104]

## **Supplementary Information**

# **Crystal Growth and Dissolution of Methylammonium Lead Iodide Perovskite in Sequential Deposition: Correlation between Morphology Evolution and Photovoltaic Performance**

Tsung-Yu Hsieh, Chi-Kai Huang, Tzu-Sen Su, Cheng-You Hong and Tzu-Chien Wei \*

Department of Chemical Engineering, National Tsing-Hua University, Taiwan

\*Corresponding author: Tzu-Chien Wei

Tel: +886-3-5715131 ext.33669

E-mail: [tcwei@mx.nthu.edu.tw](mailto:tcwei@mx.nthu.edu.tw)

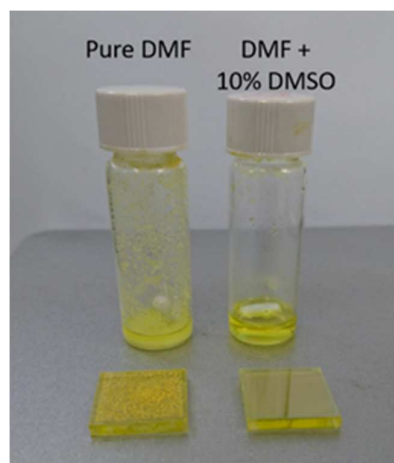

**Figure S1** Photo of  $\text{PbI}_2$  precursor solution prepared by pure (left) and 10% DMSO addition DMF (right) and corresponding spin-coated film. It can be seen that clear yellow solution can be obtained by 10% DMSO addition and the spin-coated film using this precursor solution appears uniformly yellow color, implying it is not  $\text{PbI}_2$ -DMSO complex).

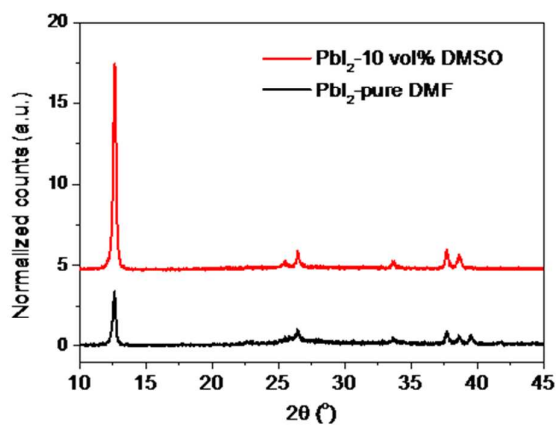

**Figure S2** XRD characteristics of  $\text{PbI}_2$  film prepared by pure DMF (black curve) and DMF/DMSO mix solvent (red curve).

Table S1. Average photovoltaic parameters in both forward and backward scan direction among 3 to 8 devices with standard deviation.

| Dipping time | Scan direction | $J_{SC}$ (mA/cm <sup>2</sup> ) | $V_{OC}$ (V)     | FF               | PCE (%)           |
|--------------|----------------|--------------------------------|------------------|------------------|-------------------|
| 10 seconds   | Forward scan   | $17.75 \pm 0.327$              | $1.06 \pm 0.018$ | $0.74 \pm 0.004$ | $13.89 \pm 0.426$ |
|              | Backward scan  | $17.63 \pm 0.392$              | $1.05 \pm 0.027$ | $0.73 \pm 0.028$ | $13.52 \pm 1.091$ |
| 1 minute     | Forward scan   | $18.33 \pm 0.315$              | $1.06 \pm 0.003$ | $0.73 \pm 0.013$ | $14.14 \pm 0.207$ |
|              | Backward scan  | $18.27 \pm 0.178$              | $1.07 \pm 0.002$ | $0.77 \pm 0.003$ | $15.00 \pm 0.168$ |
| 10 minutes   | Forward scan   | $17.75 \pm 0.571$              | $1.05 \pm 0.007$ | $0.71 \pm 0.005$ | $13.26 \pm 0.394$ |
|              | Backward scan  | $17.55 \pm 0.697$              | $1.04 \pm 0.013$ | $0.69 \pm 0.012$ | $12.59 \pm 0.687$ |
| 20 minutes   | Forward scan   | $6.55 \pm 3.258$               | $0.99 \pm 0.021$ | $0.58 \pm 0.096$ | $3.61 \pm 1.612$  |
|              | Backward scan  | $5.78 \pm 2.680$               | $0.89 \pm 0.110$ | $0.54 \pm 0.087$ | $2.82 \pm 1.712$  |
| 1 hour       | Forward scan   | $6.41 \pm 1.137$               | $0.90 \pm 0.009$ | $0.54 \pm 0.026$ | $3.09 \pm 0.424$  |
|              | Backward scan  | $6.19 \pm 0.798$               | $0.85 \pm 0.045$ | $0.51 \pm 0.036$ | $2.70 \pm 0.616$  |
| 3 hours      | Forward scan   | $3.88 \pm 0.595$               | $0.86 \pm 0.028$ | $0.51 \pm 0.021$ | $1.70 \pm 0.215$  |
|              | Backward scan  | $3.93 \pm 0.569$               | $0.85 \pm 0.087$ | $0.52 \pm 0.036$ | $1.77 \pm 0.456$  |
| 8 hours      | Forward scan   | $4.27 \pm 0.350$               | $0.74 \pm 0.034$ | $0.52 \pm 0.047$ | $1.63 \pm 0.157$  |
|              | Backward scan  | $3.65 \pm 0.214$               | $0.61 \pm 0.211$ | $0.48 \pm 0.097$ | $1.12 \pm 0.511$  |
| 24 hours     | Forward scan   | $3.09 \pm 0.596$               | $0.67 \pm 0.027$ | $0.48 \pm 0.054$ | $0.98 \pm 0.133$  |
|              | Backward scan  | $2.35 \pm 0.511$               | $0.52 \pm 0.114$ | $0.44 \pm 0.033$ | $0.55 \pm 0.201$  |
